# Supplementary material for: Accessible interactive learning of mathematical expressions for school students with visual disabilities
Source: PeerJ Comput Sci. 2024 Dec 23;10:e2599. doi: 10.7717/peerj-cs.2599 (PMC11784810; doi:10.7717/peerj-cs.2599)
Supplement: Supplemental Information 4 [file peerj-cs-10-2599-s004.xlsx]

## Sheet: Sheet1
Students Feedback
S.No.	Code/Number of Participant	Q/R1	Q/R2	Q/R3	Q/R4	Q/R5	Q/R6	Q/R7
1	S01	Strongly agree	Strongly agree	Strongly agree	Strongly agree	Strongly agree	Strongly agree	Strongly agree
2	S02	Strongly agree	Strongly agree	Strongly agree	Strongly agree	Strongly agree	Strongly agree	Strongly agree
3	S03	Strongly agree	Strongly agree	Strongly agree	Strongly agree	Strongly agree	Strongly agree	Strongly agree
4	S04	Strongly agree	Strongly agree	Strongly agree	Strongly agree	Strongly agree	Strongly agree	Strongly agree
5	S05	Strongly agree	Strongly agree	Strongly agree	Strongly agree	Strongly agree	Strongly agree	Strongly agree
6	S06	Strongly agree	Strongly agree	Strongly agree	Strongly agree	Strongly agree	Strongly agree	Strongly agree
7	S07	Strongly agree	Strongly agree	Strongly agree	Strongly agree	Strongly agree	Strongly agree	Strongly agree
8	S08	Strongly agree	Strongly agree	Strongly agree	Strongly agree	Strongly agree	Strongly agree	Strongly agree
9	S09	Strongly agree	Strongly agree	Strongly agree	Strongly agree	Strongly agree	Strongly agree	Strongly agree
10	S10	Strongly agree	Strongly agree	Strongly agree	Strongly agree	Strongly agree	Strongly agree	Strongly agree
11	S11	Strongly agree	Strongly agree	Strongly agree	Strongly agree	Strongly agree	Strongly agree	Strongly agree
12	S12	Strongly agree	Strongly agree	Strongly agree	Strongly agree	Strongly agree	Strongly agree	Strongly agree
13	S13	Strongly agree	Strongly agree	Strongly agree	Strongly agree	Strongly agree	Strongly agree	Strongly agree
14	S14	Strongly agree	Strongly agree	Strongly agree	Strongly agree	Strongly agree	Strongly agree	Strongly agree
15	S15	Strongly agree	Strongly agree	Strongly agree	Strongly agree	Strongly agree	Strongly agree	Strongly agree
16	S16	Strongly agree	Strongly agree	Agree	Strongly agree	Strongly agree	Strongly agree	Strongly agree
17	S17	Strongly agree	Strongly agree	Agree	Strongly agree	Strongly agree	Strongly agree	Strongly agree
18	S18	Strongly agree	Strongly agree	Agree	Strongly agree	Strongly agree	Strongly agree	Strongly agree
19	S19	Strongly agree	Strongly agree	Agree	Strongly agree	Strongly agree	Strongly agree	Strongly agree
20	S20	Strongly agree	Strongly agree	Agree	Strongly agree	Strongly agree	Strongly agree	Strongly agree
21	S21	Strongly agree	Strongly agree	Agree	Strongly agree	Strongly agree	Strongly agree	Agree
22	S22	Strongly agree	Strongly agree	Agree	Strongly agree	Strongly agree	Strongly agree	Agree		Q/R1	I found that the solution assisted me in learning mathematics.
23	S23	Strongly agree	Strongly agree	Agree	Strongly agree	Strongly agree	Strongly agree	Agree		Q/R2	Compared with access8math and screen reader, the proposed solution comprehends math resources and navigates and identifies structural elements of mathematical expressions better.
24	S24	Strongly agree	Strongly agree	Agree	Strongly agree	Strongly agree	Strongly agree	Agree		Q/R3	Compared with access8math and screen reader, the proposed solution comprehends math resources and navigates and identifies structural elements of mathematical expressions better.
25	S25	Strongly agree	Strongly agree	Agree	Strongly agree	Strongly agree	Strongly agree	Agree		Q/R4	I would consider this solution to be beneficial.
26	S26	Strongly agree	Strongly agree	Agree	Strongly agree	Agree	Strongly agree	Agree		Q/R5	I found that this solution is easy to use.
27	S27	Strongly agree	Strongly agree	Agree	Strongly agree	Agree	Strongly agree	Agree		Q/R6	I found that this solution enabled me to concentrate better while studying.
28	S28	Strongly agree	Strongly agree	Agree	Strongly agree	Agree	Strongly agree	Agree		Q/R7	This solution would be useful to me in studying math, and I would recommend it to others.
29	S29	Strongly agree	Strongly agree	Agree	Strongly agree	Agree	Agree	Agree
30	S30	Strongly agree	Strongly agree	Agree	Strongly agree	Agree	Agree	Agree
31	S31	Strongly agree	Strongly agree	Agree	Strongly agree	Agree	Agree	Agree
32	S32	Strongly agree	Strongly agree	Agree	Strongly agree	Agree	Agree	Agree
33	S33	Strongly agree	Strongly agree	Agree	Strongly agree	Agree	Agree	Agree
34	S34	Strongly agree	Strongly agree	Agree	Strongly agree	Agree	Agree	Agree
35	S35	Strongly agree	Strongly agree	Agree	Strongly agree	Agree	Agree	Agree
36	S36	Strongly agree	Strongly agree	Agree	Strongly agree	Agree	Agree	Agree
37	S37	Strongly agree	Strongly agree	Agree	Strongly agree	Agree	Agree	Agree
38	S38	Strongly agree	Strongly agree	Agree	Strongly agree	Agree	Agree	Agree
39	S39	Strongly agree	Strongly agree	Agree	Strongly agree	Agree	Agree	Agree
40	S40	Strongly agree	Strongly agree	Agree	Strongly agree	Agree	Agree	Agree
41	S41	Strongly agree	Strongly agree	Agree	Agree	Agree	Agree	Agree
42	S42	Strongly agree	Strongly agree	Agree	Agree	Agree	Agree	Agree
43	S43	Strongly agree	Strongly agree	Agree	Agree	Agree	Agree	Agree
44	S44	Strongly agree	Strongly agree	Agree	Agree	Agree	Agree	Agree
45	S45	Agree	Strongly agree	Agree	Agree	Agree	Agree	Agree
46	S46	Agree	Strongly agree	Agree	Agree	Agree	Agree	Agree
47	S47	Agree	Strongly agree	Agree	Agree	Agree	Agree	Agree
48	S48	Agree	Strongly agree	Agree	Agree	Agree	Agree	Agree
49	S49	Agree	Strongly agree	Agree	Agree	Agree	Agree	Agree
50	S50	Agree	Strongly agree	Agree	Agree	Agree	Agree	Agree
51	S51	Agree	Strongly agree	Agree	Agree	Agree	Agree	Agree
52	S52	Agree	Strongly agree	Agree	Agree	Agree	Agree	Agree
53	S53	Agree	Strongly agree	Agree	Agree	Agree	Agree	Agree
54	S54	Agree	Strongly agree	Agree	Agree	Agree	Agree	Agree
55	S55	Agree	Strongly agree	Agree	Agree	Agree	Agree	Agree
56	S56	Agree	Strongly agree	Agree	Agree	Agree	Agree	Agree
57	S57	Agree	Agree	Agree	Agree	Agree	Agree	Agree
58	S58	Agree	Agree	Agree	Agree	Agree	Agree	Agree
59	S59	Agree	Agree	Agree	Agree	Agree	Agree	Agree
60	S60	Agree	Agree	Agree	Agree	Agree	Agree	Agree
61	S61	Agree	Agree	Neutral	Agree	Agree	Agree	Neutral
62	S62	Agree	Agree	Neutral	Agree	Agree	Agree	Neutral
63	S63	Agree	Agree	Neutral	Agree	Agree	Agree	Neutral
64	S64	Agree	Agree	Neutral	Agree	Agree	Agree	Neutral
65	S65	Agree	Agree	Neutral	Agree	Agree	Agree	Neutral
66	S66	Agree	Agree	Neutral	Agree	Agree	Agree	Neutral
67	S67	Agree	Agree	Disagree	Agree	Agree	Agree	Neutral
68	S68	Agree	Agree	Disagree	Agree	Agree	Agree	Neutral
69	S69	Agree	Agree	Disagree	Agree	Agree	Agree	Neutral
70	S70	Agree	Agree	Disagree	Agree	Agree	Agree	Neutral
71	S71	Agree	Agree	Disagree	Agree	Agree	Agree	Neutral
72	S72	Agree	Agree	Disagree	Agree	Agree	Agree	Neutral
73	S73	Agree	Agree	Disagree	Agree	Agree	Agree	Neutral
74	S74	Agree	Agree	Disagree	Agree	Agree	Agree	Neutral
75	S75	Agree	Agree	Disagree	Agree	Neutral	Neutral	Disagree
76	S76	Agree	Agree	Disagree	Agree	Neutral	Neutral	Disagree
77	S77	Agree	Agree	Disagree	Agree	Neutral	Neutral	Disagree
78	S78	Agree	Agree	Disagree	Agree	Neutral	Neutral	Disagree
79	S79	Agree	Agree	Disagree	Agree	Neutral	Neutral	Disagree
80	S80	Agree	Agree	Disagree	Agree	Neutral	Neutral	Disagree
81	S81	Agree	Agree	Disagree	Agree	Neutral	Neutral	Disagree
82	S82	Agree	Agree	Disagree	Agree	Neutral	Neutral	Disagree
83	S83	Agree	Agree	Disagree	Agree	Neutral	Neutral	Disagree
84	S84	Agree	Agree	Disagree	Agree	Neutral	Neutral	Disagree
85	S85	Agree	Agree	Disagree	Agree	Neutral	Neutral	Disagree
86	S86	Agree	Agree	Disagree	Agree	Neutral	Neutral	Disagree
87	S87	Agree	Agree	Disagree	Agree	Neutral	Neutral	Disagree
88	S88	Agree	Agree	Disagree	Agree	Neutral	Neutral	Disagree
89	S89	Agree	Agree	Disagree	Agree	Neutral	Neutral	Disagree
90	S90	Agree	Agree	Disagree	Agree	Neutral	Neutral	Disagree
91	S91	Agree	Agree	Disagree	Neutral	Neutral	Neutral	Disagree
92	S92	Agree	Agree	Disagree	Neutral	Neutral	Neutral	Disagree
93	S93	Agree	Agree	Disagree	Neutral	Neutral	Neutral	Disagree
94	S94	Agree	Neutral	Disagree	Neutral	Neutral	Disagree	Disagree
Instructors feed back
S.No.	Code/Number of Participant	Q/R1	Q/R2	Q/R3	Q/R4	Q/R5	Q/R6	Q/R7
1	P01	Strongly agree	Strongly agree	Strongly agree	Strongly agree	Strongly agree	Strongly agree	Strongly agree
2	P02	Strongly agree	Strongly agree	Strongly agree	Strongly agree	Strongly agree	Strongly agree	Strongly agree
3	P03	Strongly agree	Strongly agree	Strongly agree	Strongly agree	Strongly agree	Strongly agree	Strongly agree
4	P04	Strongly agree	Strongly agree	Strongly agree	Strongly agree	Strongly agree	Strongly agree	Strongly agree
5	P05	Strongly agree	Strongly agree	Strongly agree	Strongly agree	Strongly agree	Strongly agree	Strongly agree
6	P06	Strongly agree	Strongly agree	Strongly agree	Strongly agree	Strongly agree	Strongly agree	Strongly agree
7	P07	Strongly agree	Strongly agree	Strongly agree	Strongly agree	Strongly agree	Strongly agree	Strongly agree
8	P08	Strongly agree	Strongly agree	Strongly agree	Strongly agree	Strongly agree	Strongly agree	Strongly agree
9	P09	Strongly agree	Strongly agree	Strongly agree	Strongly agree	Strongly agree	Strongly agree	Strongly agree
10	P10	Strongly agree	Strongly agree	Strongly agree	Strongly agree	Strongly agree	Strongly agree	Strongly agree
11	P11	Strongly agree	Strongly agree	Agree	Agree	Strongly agree	Agree	Strongly agree
12	P12	Strongly agree	Strongly agree	Agree	Agree	Strongly agree	Agree	Strongly agree
13	P13	Strongly agree	Agree	Neutral	Agree	Strongly agree	Neutral	Agree
14	P14	Strongly agree	Agree	Neutral	Agree	Agree	Neutral	Agree
15	P15	Agree	Neutral	Disagree	Neutral	Agree	Neutral	Neutral
	Q/R1	I discovered that this solution aided my students in comprehending math handouts, exercises, and exams.
	Q/R2	I belive that this solution could assist my students in focusing more on ther math studies.
	Q/R3	I have found that this solution is particulary useful when solving math problems.
	Q/R4	I thaink that this solution has the potential to improve my students capacity for independent study.
	Q/R5	In my experience, this solution is user friendly.
	Q/R6	I found that this solution navigates, and identifies all elements of mathematical expressions comparitively screen reader and access8math.
	Q/R7	I wholeheartedly endorse this solution and would recommend it to others.
